# Supplementary material
Source: ML conference proceedings conference paper supplement (https://proceedings.neurips.cc/paper_files/paper/2018/hash/310ce61c90f3a46e340ee8257bc70e93-Abstract.html)
Supplement: Supplementary file [file 310ce61c90f3a46e340ee8257bc70e93-Supplemental.zip]

## A Modular GRU

We propose the *modular GRU*, defined by

$$\begin{aligned} z_t &= \sigma(W_z \cdot [h_{t-1}, x_t]) \\ r_t &= \sigma(W_r \cdot [h_{t-1}, x_t]) \\ \tilde{h}_t &= \text{ReLU}\left(\sum_{i=0}^K f_{a_i^{(t)}}([r_t \odot h_{t-1}, x_t])\right) \\ h_t &= (1 - z_t) \odot h_{t-1} + z_t \odot \tilde{h}_t \end{aligned}$$

where  $h_t$  is the RNN’s hidden state at time  $t$ ,  $z_t$  and  $r_t$  are gate values and  $\tilde{h}_t$  is the candidate state produced by the modular layer at time step  $t$ . Both the controller  $p(a_t|h_{t-1}, x_t, \phi)$  and the modules  $f_m([r_t \odot h_{t-1}, x_t]; \theta_m)$  depend on the current input  $x_t$  and previous state  $h_{t-1}$ . The parameters  $\phi$  and  $\theta_m$  for  $m = 1, \dots, M$  are shared across all timesteps.

## B Toy Regression Problem

To demonstrate the ability of our algorithm to learn conditional execution, we constructed the following regression problem: For each data point  $(x_n, y_n)$ , the input vectors  $x_n$  are generated from a mixture of Gaussians with two components with uniform latent mixture probabilities  $p(s_n = 1) = p(s_n = 2) = \frac{1}{2}$  according to  $x_n|s_n \sim \mathcal{N}(x_n|\mu_{s_n}, \Sigma_{s_n})$ . Depending on the component  $s_n$ , the target  $y_n$  is generated by linearly transforming the input  $x_n$  according to

$$y_n = \begin{cases} Rx_n & \text{if } s_n = 1 \\ Sx_n & \text{otherwise} \end{cases} \quad (1)$$

where  $R$  is a randomly generated rotation matrix and  $S$  is a diagonal matrix with random scaling factors. Figure 1 shows one possible such dataset.

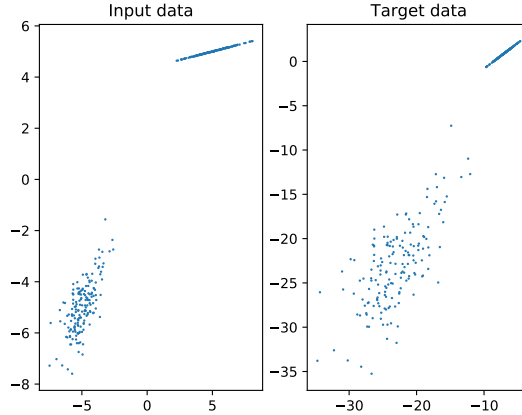

Figure 1: The toy regression problem. Input data from a mixture of Gaussians (left) is transformed by scaling data from one mixture component and rotating the other around the origin yielding the target data (right).

## C Language Modeling Experiments

We use a batch size of 128 elements and unroll the network for 35 steps, training with input sequences of that length. Each module has only 8 units. For the E-step, we sample  $S = 10$  paths and run 15 gradient steps in each partial M-step.

## **D Image Classification Experiments**

We use three modular layers with  $3 \times 3$  convolutional kernels, striding two, and a single output channel followed by two fully connected modular layers with 48 hidden units and 10 output units respectively. We execute 2 out of 10 modules in each layer and concatenate their outputs. The baseline is non-modular with the same number of parameters that 2 modules would have. In effect, this roughly matches the amount of computation that is required to run the modular and non-modular variant.
